## RESEARCH ARTICLE

# Platelet count and hypertension as indicators of height loss in the general population: A prospective study

Yuji Shimizu<sup>1,2\*</sup>, Hirotomo Yamanashi<sup>1,3</sup>, Yuko Noguchi<sup>4</sup>, Shin-Ya Kawashiri<sup>3,4</sup>, Kazuhiko Arima<sup>3,5</sup>, Yasuhiro Nagata<sup>3,4</sup>, Takahiro Maeda<sup>1,3</sup>

**1** Department of General Medicine, Nagasaki University Graduate School of Biomedical Sciences, Nagasaki, Japan, **2** Epidemiology Section, Division of Public Health, Osaka Institute of Public Health, Osaka, Japan, **3** Leading Medical Research Core Unit, Nagasaki University Graduate School of Biomedical Sciences, Nagasaki, Japan, **4** Department of Community Medicine, Nagasaki University Graduate School of Biomedical Sciences, Nagasaki, Japan, **5** Department of Public Health, Nagasaki University Graduate School of Biomedical Sciences, Nagasaki, Japan

\* [simizu@iph.osaka.jp](mailto:simizu@iph.osaka.jp)

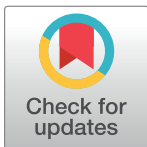

## OPEN ACCESS

**Citation:** Shimizu Y, Yamanashi H, Noguchi Y, Kawashiri S-Y, Arima K, Nagata Y, et al. (2024) Platelet count and hypertension as indicators of height loss in the general population: A prospective study. *PLoS ONE* 19(12): e0314527. <https://doi.org/10.1371/journal.pone.0314527>

**Editor:** Aleksandra Klisic, University of Montenegro-Faculty of Medicine, MONTENEGRO

**Received:** September 13, 2024

**Accepted:** November 12, 2024

**Published:** December 2, 2024

**Copyright:** © 2024 Shimizu et al. This is an open access article distributed under the terms of the [Creative Commons Attribution License](https://creativecommons.org/licenses/by/4.0/), which permits unrestricted use, distribution, and reproduction in any medium, provided the original author and source are credited.

**Data Availability Statement:** According to ethical guidelines in Japan, we cannot provide individual data due to participant privacy considerations. In addition, the informed consent obtained does not include a provision for publicly sharing data. Qualified researchers may apply to access a minimal dataset by contacting Prof. Takahiro Maeda, Principal Investigator, Department of General Medicine, Nagasaki University, Nagasaki, Japan at [tamaeda@nagasaki-u.ac.jp](mailto:tamaeda@nagasaki-u.ac.jp) or the Office of Data Management at [ritouken@vc.fctv-net.jp](mailto:ritouken@vc.fctv-net.jp). Information about data requests is also available

## Abstract

Circulating CD34-positive cell count is inversely associated with height loss. It acts as an indicator of endothelial repair activity. In conjunction with CD34-positive cells, platelets contribute to endothelial repair. The presence of hypertension increases the demand for endothelial repair. Therefore, platelet count could be associated with height loss among individuals with hypertension. A retrospective study of 2,343 individuals aged 40 to 79 years was conducted. Height loss was defined as being in the highest quartile of annual height decrease (1.6 mm/year for men and 2.0 mm/year for women). A significant inverse association between platelet count and height loss was observed only among participants with hypertension. After adjusting for known cardiovascular risk factors, the odds ratio (95% confidence interval) for height loss per 1 standard deviation increment in platelet count ( $5.09 \times 10^4/\mu\text{L}$  for men and  $5.03 \times 10^4/\mu\text{L}$  for women) was 0.83 (0.70, 0.98) for participants with hypertension and 1.02 (0.90, 1.16) for participants without hypertension. Independent of known cardiovascular risk factors, platelets could prevent accelerated height loss among individuals with hypertension. Unlike CD34-positive cell count, platelet count and blood pressure, which are easy to assess in daily clinical practice, influence height loss.

## Introduction

Independent of known cardiovascular risk factors, circulating CD34-positive cell count is significantly inversely associated with height loss among Japanese individuals aged 60–69 years [1]. Since circulating CD34-positive cell count could act as an indicator of endothelial repair activity [2], higher endothelial repair activity might prevent height loss.

Height loss starting in middle age is an independent risk factor for cardiovascular mortality among the elderly [3] while circulating CD34-positive cell count is also reported to be inversely associated with cardiovascular mortality [4, 5]. Therefore, CD34-positive cells could be

online at: <https://www.mh.nagasaki-u.ac.jp/soshin/> (accessed on 25th August 2024). and <http://www.med.nagasaki-u.ac.jp/cm/> (accessed on 28th August 2024).

**Funding:** This study was supported by Grants-in-Aids for Scientific Research from Japan Society for the Promotion of Science (No.21H02575 for TM, No.22K06421 for YS). Funders had no role in study design, data collection and analysis, decision to publish, or preparation of the manuscript.

**Competing interests:** The authors declare that they have no known competing financial interests or personal relationships that could have appeared to influence the work reported in this paper.

contributing to the prevention of height loss related to cardiovascular mortality. However, measuring circulating CD34-positive cells is not easy in daily clinical practice.

In conjunction with platelets, CD34-positive cells contribute to endothelial repair [6, 7]. Platelet count, which is easy to measure in daily clinical practice, could act as an indicator of endothelial repair activity [8]. Endothelial repair is required when the endothelium is injured. Hypertension, which strongly injures the endothelium, is a well-established cause of death from cardiovascular disease in the general Japanese population [9]. Therefore, hypertension status might influence the association between platelet count and height loss in the general population.

We hypothesized that platelet count is significantly inversely associated with height loss only among individuals with hypertension. To test our hypothesis, we conducted a prospective study of 2,343 Japanese individuals aged 40–79 years with mean follow-up of 3.4 years (standard deviation [SD], 1.2 years).

## Methods

### Study population

The study population comprised 2,977 residents of Goto city or rural communities in western Japan aged 40–79 years who underwent an annual medical check-up from 2014–2016, which was considered the baseline evaluation. Participants without platelet count data ( $n = 35$ ), blood pressure data ( $n = 4$ ), or data on smoking habits ( $n = 5$ ) and drinking habits ( $n = 1$ ) were excluded. We also excluded 589 individuals who did not undergo an annual health check-up during the follow-up period (2015–2019). The remaining participants, 2,343 individuals aged  $67.9 \pm 7.8$  years (range, 40–79 years), were enrolled in the study.

All procedures performed in this study were in accordance with the ethical standards of the institutional research committee and the 1964 Declaration of Helsinki and its later amendments. Written consent forms were used to ensure that participants understood the objectives of the study when obtaining informed consent. The study was approved by the Ethics Committee of Nagasaki University Graduate School of Biomedical Sciences (project registration number: 14051404). Data for research purposes was accessed on 10 April 2024. No personally identifiable information was available to any of the authors.

### Data collection and laboratory measurements

Trained interviewers obtained information on clinical characteristics. Body weight and height were measured using an automatic body composition analyzer. Body mass index (BMI) was calculated.

Systolic and diastolic blood pressure were measured in the right arm after at least 5 minutes of rest, in a sitting position, with a blood pressure measuring device (HEM-907; Omron, Kyoto, Japan) and recorded by trained examiners. Hypertension was defined as systolic blood pressure  $\geq 140$  mmHg, diastolic blood pressure  $\geq 90$  mmHg, or both.

Fasting blood samples were collected in ethylenediaminetetraacetic acid—2 potassium (EDTA-2K) and siliconized tubes. Serum high-density lipoprotein cholesterol (HDLc), serum triglycerides (TG), and hemoglobin A1c (HbA<sub>1c</sub>) were measured using standard laboratory procedures at SRL, Inc. (Tokyo, Japan).

Carotid intima-media thickness (CIMT) was measured with ultrasonography of the left and right carotid arteries by experienced vascular technicians using a LOGIQ Book XP device with a 10-MHz transducer (GE Healthcare, Milwaukee, WI, USA). The maximum values for the left and right common carotid artery CIMT were calculated using digital edge-detection software (Intimascope; MediaCross, Tokyo, Japan) with a previously described protocol [10].

Intimascope is an innovative software developed for CIMT measurement to minimize measurement errors. This software makes it possible to semi-automatically recognize the edges of the internal and external membranes of the blood vessels. It semi-automatically determines the distance at a sub-pixel level (estimated to be 0.01 mm) using a polynomial measurement formula [11].

Height loss was defined as being in the highest quartile of height decrease per year (decrease of 1.6 mm/year for men and 2.0 mm/year for women), as in a previous study [1].

### Statistical analysis

The characteristics of the study population in terms of platelet count and hypertension status are presented as means  $\pm$  SD or n (%), except for TG. Since TG values had a skewed distribution, logarithmic transformation was performed and the median (interquartile range) was presented.

Logistic regression models were used to calculate odds ratios (ORs) and 95% confidence intervals (CIs) to determine the hypertension-specific association between platelet count and height loss. The effect of hypertension on the association between platelet count and height loss was also evaluated.

Height loss is inversely associated with levels of circulating CD34-positive cells [1] that contribute to endothelial repair [2], including CIMT progression [12]. Therefore, three different models were used to calculate ORs and 95% CIs. Model 1 only adjusted for sex and age. Model 2 further adjusted made for CIMT. Finally, Model 3 further adjusted for other potential confounding factors, namely systolic blood pressure (mmHg), BMI ( $\text{kg}/\text{m}^2$ ), drinking status (non-drinker, often drinker, or daily drinker), smoking status (never smoker, former smoker, or current smoker), HDLc (mg/dL), TG (logarithmic value), and HbA1c (%).

For sensitivity analysis, the hypertension-specific association between platelet count and height loss was evaluated with another definition of height loss, i.e., being in the highest tertile of height decrease per year. Furthermore, sex-specific analysis of the main associations was also performed.

All statistical analyses were performed with SAS for Windows, version 9.4 (SAS Inc., Cary, NC). As in previous studies [13, 14], values of  $p < 0.05$  for main effects and  $p < 0.2$  for interactions were considered statistically significant.

## Results

### Characteristics of the study participants by platelet count

Table 1 shows the clinical characteristics of the study participants by platelet count. Platelet count was significantly inversely associated with age, and CIMT and significantly positively associated with diastolic blood pressure, current smoker, and TG levels.

### Characteristics of the study participants by hypertension status

The clinical characteristics of the study population by hypertension status are shown in Table 2. Compared to participants without hypertension, a higher proportion of participants with hypertension were men, daily drinkers, and former smokers, respectively. Participants with hypertension had higher age, CIMT, BMI, SBP, DBP, and TG levels than those without hypertension.

### Association between platelet count and height loss by hypertension status

Independent of known cardiovascular risk factors, platelet count was significantly inversely associated with height loss among participants with hypertension but not among those without

**Table 1. Characteristics of the study population by platelet count quartile.**

|                        | Platelet count (Quartiles) |                         |                         |                         | <i>p</i>             |
|------------------------|----------------------------|-------------------------|-------------------------|-------------------------|----------------------|
|                        | Q1                         | Q2                      | Q3                      | Q4                      |                      |
|                        | (Lowest)                   | (Lower)                 | (Higher)                | (Highest)               |                      |
| Number of participants | 585                        | 587                     | 592                     | 579                     |                      |
| Men, %                 | 37.4                       | 37.3                    | 38.0                    | 38.0                    | 0.992                |
| Height (men), cm (n)   | 163.7 ± 5.7 (219)          | 163.5 ± 6.6 (219)       | 163.8 ± 6.0 (225)       | 164.7 ± 6.9 (220)       | 0.611                |
| Height (women), cm (n) | 151.5 ± 5.8 (366)          | 151.6 ± 5.3 (368)       | 151.4 ± 5.7 (367)       | 151.2 ± 6.1 (359)       | 0.765                |
| Age, years             | 69.6 ± 7.2                 | 68.1 ± 7.5              | 67.7 ± 7.5              | 66.0 ± 8.6              | <0.001               |
| CIMT, mm               | 0.94 ± 0.23                | 0.95 ± 0.24             | 0.93 ± 0.21             | 0.91 ± 0.22             | 0.022                |
| BMI, kg/m <sup>2</sup> | 23.0 ± 3.6                 | 23.3 ± 3.2              | 23.3 ± 3.2              | 23.3 ± 3.2              | 0.188                |
| SBP, mmHg              | 132 ± 17                   | 132 ± 16                | 133 ± 17                | 133 ± 16                | 0.324                |
| DBP, mmHg              | 76 ± 11                    | 77 ± 11                 | 78 ± 11                 | 78 ± 11                 | 0.029                |
| Daily drinker, %       | 15.6                       | 15.0                    | 20.4                    | 15.5                    | 0.040                |
| Often drinker, %       | 10.9                       | 13.5                    | 9.5                     | 13.8                    | 0.064                |
| Current smoker, %      | 7.0                        | 7.7                     | 10.6                    | 13.3                    | <0.001               |
| Former smoker, %       | 22.1                       | 20.8                    | 24.3                    | 22.8                    | 0.529                |
| TG, mg/dL              | 84                         | 90                      | 95                      | 98                      | <0.001* <sup>2</sup> |
|                        | [60, 117]* <sup>1</sup>    | [67, 121]* <sup>1</sup> | [68, 133]* <sup>1</sup> | [70, 142]* <sup>1</sup> |                      |
| HDLc, mg/dL            | 61 ± 15                    | 60 ± 15                 | 61 ± 15                 | 60 ± 14                 | 0.231                |
| HbA1c, %               | 5.70 ± 0.56                | 5.69 ± 0.48             | 5.71 ± 0.52             | 5.75 ± 0.57             | 0.221                |

Values are means ± standard deviation unless otherwise indicated.

\*1: Values are medians [interquartile quartile].

\*2: Logarithmic transformation was performed. CIMT: carotid intima-media thickness. BMI: body mass index. SBP: systolic blood pressure. DBP: diastolic blood pressure. TG: triglycerides. HDLc: high-density lipoprotein cholesterol. HbA1c: glycated hemoglobin. Quartiles of platelets levels for men were  $<18.4 \times 10^4/\mu\text{L}$  for Q1 (Lowest),  $18.4\text{--}21.3 \times 10^4/\mu\text{L}$  for Q2 (Lower),  $21.4\text{--}24.7 \times 10^4/\mu\text{L}$  for Q3 (Higher), and  $\geq 24.8 \times 10^4/\mu\text{L}$  for Q4 (Highest). For women, the corresponding values were  $<19.5 \times 10^4/\mu\text{L}$  for Q1 (Lowest),  $19.6\text{--}22.6 \times 10^4/\mu\text{L}$  for Q2 (Lower),  $22.7\text{--}26.2 \times 10^4/\mu\text{L}$  for Q3 (Higher), and  $\geq 26.3 \times 10^4/\mu\text{L}$  for Q4 (Highest).

<https://doi.org/10.1371/journal.pone.0314527.t001>

hypertension (Table 3). The fully adjusted OR (95% CI) for height loss with each 1 SD increment in platelet count was 0.83 (0.70, 0.98) for participants with hypertension and 1.02 (0.90, 1.16) for participants without hypertension.

### Influence of hypertension on the association between platelet count and height loss

Hypertension had a significant effect on the association between platelet count and height loss. The adjusted *p* value was 0.062 for Model 1, 0.061 for Model 2, and 0.064 for Model 3.

### Sex-specific findings

Essentially the same associations were observed for men and women. Among participants with hypertension, the OR (95% CI) in the model that adjusted for known cardiovascular risk factors (Model 3) for height loss per 1 SD increment in platelet count was 0.80 (0.61, 1.04) for men (*n* = 326) and 0.84 (0.68, 1.05) for women (*n* = 465). Among participants without hypertension, the corresponding values were 1.03 (0.84, 1.28) for men (*n* = 557) and 1.02 (0.87, 1.19) for women (*n* = 995).

### Hypertension-specific association between height loss defined as being in the highest tertile of height decrease per year and platelet count

For sensitivity analysis, the hypertension-specific association between height loss defined as being in the highest tertile of height decrease per year and platelet count was also calculated;

**Table 2. Characteristics of the study participants by hypertension status.**

|                        | Hypertension               |                            | p                    |
|------------------------|----------------------------|----------------------------|----------------------|
|                        | (-)                        | (+)                        |                      |
| Number of participants | 1552                       | 791                        |                      |
| Men, %                 | 35.9                       | 41.2                       | 0.012                |
| Age, years             | 67.3 ± 8.1                 | 69.0 ± 7.2                 | <0.001               |
| Height (men), cm (n)   | 164.0 ± 6.4 (557)          | 163.6 ± 6.2 (326)          | 0.387                |
| Height (women), cm (n) | 151.5 ± 5.7 (995)          | 151.2 ± 5.6 (465)          | 0.182                |
| CIMT, mm               | 0.92 ± 0.22                | 0.97 ± 0.22                | <0.001               |
| BMI, kg/m <sup>2</sup> | 22.9 ± 3.2                 | 23.9 ± 3.4                 | <0.001               |
| SBP, mmHg              | 123 ± 10                   | 150 ± 12                   | <0.001               |
| DBP, mmHg              | 73 ± 8                     | 86 ± 11                    | <0.001               |
| Daily drinker, %       | 14.6                       | 20.6                       | <0.001               |
| Often drinker, %       | 12.5                       | 10.7                       | 0.215                |
| Current smoker, %      | 9.9                        | 9.2                        | 0.026                |
| Former smoker, %       | 20.7                       | 26.0                       | 0.003                |
| TG, mg/dL              | 88 [64, 122] <sup>*1</sup> | 99 [71, 135] <sup>*1</sup> | <0.001 <sup>*2</sup> |
| HDLc, mg/dL            | 61 ± 15                    | 60 ± 15                    | 0.788                |
| HbA1c, %               | 5.70 ± 0.52                | 5.74 ± 0.56                | 0.221                |

Values are means ± standard deviation unless otherwise indicated.

\*1: Values are medians [interquartile quartile].

\*2: Logarithmic transformation was performed. CIMT: carotid intima-media thickness. BMI: body mass index. SBP: systolic blood pressure. DBP: diastolic blood pressure. TG: triglycerides. HDLc: high-density lipoprotein cholesterol. HbA1c: glycated hemoglobin.

<https://doi.org/10.1371/journal.pone.0314527.t002>

**Table 3. Association between platelet count and height loss by hypertension status.**

|                           | Platelet count (Quartiles) |                   |                   |                   | p     | 1 SD increment in platelet count |
|---------------------------|----------------------------|-------------------|-------------------|-------------------|-------|----------------------------------|
|                           | Q1 (Lowest)                | Q2 (Lower)        | Q3 (Higher)       | Q4 (Highest)      |       |                                  |
| <b>Hypertension (-)</b>   |                            |                   |                   |                   |       |                                  |
| Number of participants    | 393                        | 407               | 383               | 369               |       |                                  |
| Number of height loss (%) | 102 (26.0)                 | 93 (22.9)         | 95 (24.8)         | 81 (22.0)         |       |                                  |
| Model 1                   | Ref                        | 0.90 (0.65, 1.25) | 1.03 (0.74, 1.43) | 0.94 (0.67, 1.32) | 0.921 | 1.01 (0.89, 1.14)                |
| Model 2                   | Ref                        | 0.90 (0.65, 1.25) | 1.03 (0.74, 1.43) | 0.94 (0.67, 1.32) | 0.914 | 1.01 (0.89, 1.14)                |
| Model 3                   | Ref                        | 0.89 (0.64, 1.24) | 1.05 (0.75, 1.46) | 0.94 (0.67, 1.34) | 0.999 | 1.02 (0.90, 1.16)                |
| <b>Hypertension (+)</b>   |                            |                   |                   |                   |       |                                  |
| Number of participants    | 192                        | 180               | 209               | 210               |       |                                  |
| Number of height loss (%) | 68 (35.4)                  | 49 (27.2)         | 50 (23.9)         | 48 (22.9)         |       |                                  |
| Model 1                   | Ref                        | 0.69 (0.44, 1.08) | 0.60 (0.39, 0.93) | 0.59 (0.38, 0.92) | 0.015 | 0.83 (0.71, 0.98)                |
| Model 2                   | Ref                        | 0.67 (0.43, 1.05) | 0.60 (0.39, 0.93) | 0.59 (0.38, 0.92) | 0.016 | 0.83 (0.71, 0.98)                |
| Model 3                   | Ref                        | 0.70 (0.45, 1.10) | 0.59 (0.38, 0.92) | 0.59 (0.38, 0.93) | 0.015 | 0.83 (0.70, 0.98)                |

Model 1 adjusted for sex and age. Model 2 adjusted for sex, age, and carotid intima-media thickness (CIMT). Model 3 adjusted for sex, age, body mass index, drinking status, smoking status, systolic blood pressure (SBP), triglycerides (TG), high-density lipoprotein cholesterol (HDLc), and glycated hemoglobin (HbA1c). Height loss was defined as being in the highest quartile of height decrease per year. Ref: Reference; SD, standard deviation. Quartiles of platelets levels for men were  $<18.4 \times 10^4/\mu\text{L}$  for Q1 (Lowest),  $18.4\text{--}21.3 \times 10^4/\mu\text{L}$  for Q2 (Lower),  $21.4\text{--}24.7 \times 10^4/\mu\text{L}$  for Q3 (Higher), and  $\geq 24.8 \times 10^4/\mu\text{L}$  for Q4 (Highest). For women, the corresponding values were  $<19.5 \times 10^4/\mu\text{L}$  for Q1 (Lowest),  $19.6\text{--}22.6 \times 10^4/\mu\text{L}$  for Q2 (Lower),  $22.7\text{--}26.2 \times 10^4/\mu\text{L}$  for Q3 (Higher), and  $\geq 26.3 \times 10^4/\mu\text{L}$  for Q4 (Highest). The 1 SD increment in platelet count was  $5.09 \times 10^4/\mu\text{L}$  for men and  $5.03 \times 10^4/\mu\text{L}$  for women.

<https://doi.org/10.1371/journal.pone.0314527.t003>

the result was essentially the same. In the fully adjusted model (Model 3), the OR (95% CI) for height loss with each 1 SD increment in platelet count was 0.82 (0.70, 0.96) for those with hypertension and 1.11 (0.99, 1.25) for those without hypertension.

## Discussion

The major finding of the present study is that independent of known cardiovascular risk factors, platelet count is inversely associated with height loss among individuals with hypertension but not among those without hypertension.

However, the mechanism underlying those associations has not been clarified yet. Sex might not affect the hypertension-specific association between platelet count and height loss because the sensitivity analysis found essentially the same associations in both sexes.

A previous study of men aged 60 to 69 years showed a significant inverse association between height loss defined as being in the highest quartile of height decrease per year and circulating CD34-positive cell count [1]. After adjusting for known cardiovascular risk factors, the OR (95% CI) for height loss with circulating CD34-positive cell count (logarithmic values) was 0.49 (0.32, 0.74). Inappropriate endothelial repair related to a shortage of circulating CD34-positive cells [2, 15] might be a significant risk factor for height loss. In other words, appropriate endothelial repair related to having a sufficient circulating CD34-positive cell count could prevent height loss.

In conjunction with hematopoietic stem cells known as CD34-positive cells, platelets play an important role in endothelial repair [6, 7], including the development of atherosclerosis [6, 16]. Thus, platelet count could act as an indicator of endothelial activity [8] and higher levels of endothelial repair activity might have the beneficial effect of preventing height loss. However, in the present study, an inverse association between platelet count and height loss was observed only among participants with hypertension.

Hypertension is strongly associated with endothelial repair activity [2, 17]. In this study, participants with hypertension had more cardiovascular risk factors than participants without hypertension. Therefore, to maintain vascular health among individuals with hypertension, active endothelial repair is necessary. Since platelet count could indicate endothelial repair activity [8], platelet count could be inversely associated with height loss among individuals with hypertension.

However, mechanisms that explain the association between inappropriate endothelial repair and height loss in the general population have not yet been clarified. The main reasons for height loss among adults are intervertebral disc degeneration and vertebral fracture. Disturbance of blood flow to intervertebral discs is an important part of the pathogenesis of intervertebral disc degeneration [18]. Disruption of the microcirculation is associated with many bone diseases, including osteoporosis [19]. Therefore, maintenance of the microcirculation could be important to preventing intervertebral disc degeneration and osteoporosis. Since CD34-positive cells also play an important role in the development of angiogenesis [20], they contribute to maintenance of the microcirculation [2, 21]. In conjunction with circulating CD34-positive cells, platelets contribute to endothelial repair [6, 7]; higher platelet counts in individuals with hypertension might indicate the presence of appropriate maintenance of the microcirculation related to the prevention of intervertebral disc degeneration and vertebral fracture.

Although circulating CD34-positive cell count is inversely associated with height loss [1], measuring CD34-positive cells is not easy in daily clinical practice. In the present study, platelets, which contribute to endothelial repair in conjunction with CD34-positive cells, were inversely associated with height loss among participants with hypertension. Since blood



pressure and platelet count are easy to measure, they might be efficient ways to estimate the risk of height loss in daily clinical practice. In addition, because the present study focused on a biological marker related to active endothelial repair, our present findings can help clarify novel mechanisms that induce height loss.

Limitations of the present study warrant consideration. Because most cases of intervertebral disc degeneration and vertebral compression fracture, which are the main causes of height loss, are asymptomatic [22, 23], we could not evaluate the causes of height loss using a questionnaire. To evaluate causes of height loss, imaging data from plain radiography, computed tomography, or magnetic resonance imaging are necessary. While being in the highest quartile of height decrease per year was defined as height loss in the present study, an efficient cutoff point for defining height loss has not been established. However, additional analysis with height loss defined as being in the highest tertile of height decrease per year showed essentially the same associations.

Height loss starting in middle age is associated with mortality from cardiovascular disease [3]. The present study indicates that insufficient endothelial repair might be an independent risk factor for height loss. Since circulating CD34-positive cell count is inversely associated with mortality from cardiovascular disease [4, 5], the present study suggests that height loss and hypertension status could be efficient ways to evaluate endothelial repair activity. Further investigation of this concept is necessary.

## Conclusion

Independent of known cardiovascular risk factors, platelet count is inversely associated with height loss only in individuals with hypertension. Although further investigation is necessary, the present findings indicate that height loss and the presence of hypertension might act as indicators of endothelial repair activity.

## Acknowledgments

We are grateful to the staff of the Goto City Hall office for their outstanding support.

## Author Contributions

**Conceptualization:** Yuji Shimizu, Takahiro Maeda.

**Data curation:** Yuji Shimizu, Hiroto Yamanashi, Yuko Noguchi, Shin-Ya Kawashiri, Takahiro Maeda.

**Formal analysis:** Yuji Shimizu, Yuko Noguchi.

**Funding acquisition:** Yuji Shimizu, Takahiro Maeda.

**Investigation:** Yuji Shimizu, Yuko Noguchi.

**Methodology:** Yuji Shimizu, Takahiro Maeda.

**Project administration:** Yuji Shimizu, Takahiro Maeda.

**Resources:** Yuji Shimizu, Hiroto Yamanashi, Yuko Noguchi, Shin-Ya Kawashiri, Kazuhiko Arima, Yasuhiro Nagata, Takahiro Maeda.

**Software:** Yuji Shimizu, Hiroto Yamanashi, Yuko Noguchi.

**Supervision:** Yuji Shimizu.

**Validation:** Yuji Shimizu, Yuko Noguchi.

**Visualization:** Yuji Shimizu, Yuko Noguchi, Takahiro Maeda.

**Writing – original draft:** Yuji Shimizu.

**Writing – review & editing:** Yuji Shimizu.

## References

1. Shimizu Y, Kawashiri SY, Nobusue K, Nonaka F, Tamai M, Honda Y, et al. Association between circulating CD34-positive cell count and height loss among older men. *Sci Rep.* 2022; 12(1):7175. <https://doi.org/10.1038/s41598-022-11040-y> PMID: 35504933
2. Shimizu Y. Mechanism underlying vascular remodeling in relation to circulating CD34-positive cells among older Japanese men. *Sci Rep.* 2022; 12(1):21823. <https://doi.org/10.1038/s41598-022-26089-y> PMID: 36528703
3. Masunari N, Fujiwara S, Kasagi F, Takahashi I, Yamada M, Nakamura T. Height loss starting in middle age predicts increased mortality in the elderly. *J Bone Miner Res.* 2012; 27(1):138–45. <https://doi.org/10.1002/jbmr.513> PMID: 21932348
4. Muggeridge D, Dodd J, Ross MD. CD34<sup>+</sup> progenitors are predictive of mortality and are associated with physical activity in cardiovascular disease patients. *Atherosclerosis.* 2021; 333:108–15. <https://doi.org/10.1016/j.atherosclerosis.2021.07.004> PMID: 34340831
5. Patel RS, Li Q, Ghasemzadeh N, Eapen DJ, Moss LD, Janjua AU, et al. Circulating CD34<sup>+</sup> progenitor cells and risk of mortality in a population with coronary artery disease. *Circ Res.* 2015; 116(2):289–97. <https://doi.org/10.1161/CIRCRESAHA.116.304187> PMID: 25323857
6. Stellos K, Seizer P, Bigalke B, Daub K, Geisler T, Gawaz M. Platelet aggregates-induced human CD34<sup>+</sup> progenitor cell proliferation and differentiation to macrophages and foam cells is mediated by stromal cell derived factor 1 in vitro. *Semin Thromb Hemost.* 2010; 36(2):139–45. <https://doi.org/10.1055/s-0030-1251497> PMID: 20414828
7. Stellos K, Langer H, Daub K, Schoenberger T, Gauss A, Geisler T, et al. Platelet-derived stromal cell-derived factor-1 regulates adhesion and promotes differentiation of human CD34<sup>+</sup> cells to endothelial progenitor cells. *Circulation.* 2008; 117(2):206–15. <https://doi.org/10.1161/CIRCULATIONAHA.107.714691> PMID: 18086932
8. Shimizu Y, Sato S, Koyamatsu J, Yamanashi H, Nagayoshi M, Kadota K, et al. Platelets as an indicator of vascular repair in elderly Japanese men. *Oncotarget.* 2016; 7(29):44919–26. <https://doi.org/10.18632/oncotarget.10229> PMID: 27374094
9. Takashima N, Ohkubo T, Miura K, Okamura T, Murakami Y, Fujiyoshi A, et al. Long-term risk of BP values above normal for cardiovascular mortality: a 24-year observation of Japanese aged 30 to 92 years. *J Hypertens.* 2012; 30(12):2299–306. <https://doi.org/10.1097/HJH.0b013e328359a9f7> PMID: 23079682
10. Hara T, Takamura N, Akashi S, Nakazato M, Maeda T, Wada M, et al. Evaluation of clinical markers of atherosclerosis in young and elderly Japanese adults. *Clin Chem Lab Med.* 2006; 44(7):824–9. <https://doi.org/10.1515/CCLM.2006.149> PMID: 16776627
11. Yanase T, Nasu S, Mukuta Y, Shimizu Y, Nishihara T, Okabe T, et al. Evaluation of a new carotid intima-media thickness measurement by B-mode ultrasonography using an innovative measurement software, intimascope. *Am J Hypertens.* 2006; 19(12):1206–12. <https://doi.org/10.1016/j.amjhyper.2006.05.010> PMID: 17161764
12. Shimizu Y, Kawashiri SY, Kiyoura K, Koyamatsu J, Fukui S, Tamai M, et al. Circulating CD34<sup>+</sup> cells and active arterial wall thickening among elderly men: A prospective study. *Sci Rep.* 2020; 10(1):4656. <https://doi.org/10.1038/s41598-020-61475-4> PMID: 32170211
13. Shimizu Y, Yamanashi H, Noguchi Y, Koyamatsu J, Nagayoshi M, Kiyoura K, et al. Association between chronic kidney disease and carotid intima-media thickness in relation to circulating CD34-positive cell count among community-dwelling elderly Japanese men. *Atherosclerosis.* 2019; 283: 85–91. <https://doi.org/10.1016/j.atherosclerosis.2019.02.004> PMID: 30818167
14. Li J, Agarwal SK, Alonso A, Blecker S, Chamberlain AM, London SJ, et al. Airflow obstruction, lung function, and incidence of atrial fibrillation: the Atherosclerosis Risk in Communities (ARIC) study. *Circulation.* 2014; 129(9):971–80. <https://doi.org/10.1161/CIRCULATIONAHA.113.004050> PMID: 24344084
15. Shimizu Y, Yamanashi H, Noguchi Y, Koyamatsu J, Nagayoshi M, Kiyoura K, et al. Cardio-ankle vascular index and circulating CD34-positive cell levels as indicators of endothelial repair activity in older Japanese men. *Geriatr Gerontol Int.* 2019; 19(6):557–62. <https://doi.org/10.1111/ggi.13657> PMID: 30920121



16. Chistiakov DA, Melnichenko AA, Myasoedova VA, Grechko AV, Orekhov AN. Mechanisms of foam cell formation in atherosclerosis. *J Mol Med (Berl)*. 2017; 95(11):1153–65. <https://doi.org/10.1007/s00109-017-1575-8> PMID: 28785870
17. Shimizu Y, Kawashiri SY, Kiyoura K, Nobusue K, Yamanashi H, Nagata Y, et al. Gamma-glutamyl transpeptidase ( $\gamma$ -GTP) has an ambivalent association with hypertension and atherosclerosis among elderly Japanese men: a cross-sectional study. *Environ Health Prev Med*. 2019; 24(1):69. <https://doi.org/10.1186/s12199-019-0828-2> PMID: 31785607
18. Han IB, Ropper AE, Teng YD, Shin DA, Jeon YJ, Park HM, et al. Association between VEGF and eNOS gene polymorphisms and lumbar disc degeneration in a young Korean population. *Genet Mol Res*. 2013; 12(3):2294–305. <https://doi.org/10.4238/2013.July.8.10> PMID: 23884772
19. Tong X, Chen X, Zhang S, Huang M, Shen X, Xu J, et al. The effect of exercise on the prevention of osteoporosis and bone angiogenesis. *Biomed Res Int*. 2019; 2019:8171897. <https://doi.org/10.1155/2019/8171897> PMID: 31139653
20. Hassanpour M, Salybekov AA, Kobayashi S, Asahara T. CD34 positive cells as endothelial progenitor cells in biology and medicine. *Front Cell Dev Biol*. 2023; 11:1128134. <https://doi.org/10.3389/fcell.2023.1128134> PMID: 37138792
21. Shimizu Y. Comment on “Does body height affect vascular function?” *Hypertens Res*. 2022; 45(6):1091–92. <https://doi.org/10.1038/s41440-022-00887-3> PMID: 35332286
22. Peng Y, Lv FJ. Symptomatic versus asymptomatic intervertebral disc degeneration: Is inflammation the Key? *Crit Rev Eukaryot Gene Expr*. 2015; 25(1):13–21. <https://doi.org/10.1615/critreveukaryotgeneexpr.2015012369> PMID: 25955814
23. McCarthy J, Davis A. Diagnosis and management of vertebral compression fractures. *Am Fam Physician*. 2016; 94(1):44–50. PMID: 27386723
